# Supplementary material for: Immune-Related Adverse Events and Survival Among Patients With Metastatic NSCLC Treated With Immune Checkpoint Inhibitors
Source: PubMed Central journal article supplement (PMC10797458; doi:10.1001/jamanetworkopen.2023.52302), 2024-01-18
Supplement: jamanetwopen-e2352302-s001.pdf [file jamanetwopen-e2352302-s001.pdf]

## Data Sharing Statement

Cook. Survival in Patients With Metastatic Non–Small Cell Lung Cancer Treated With Immune Checkpoint Inhibitors. *JAMA Netw Open*. Published January 18, 2024.  
doi:10.1001/jamanetworkopen.2023.52302

### Data

**Data available:** No
